# Supplementary material for: Leveraging Infrastructure BIM for Life-Cycle-Based Sustainable Road Pavement Management
Source: MDPI journal article supplement (doi:10.3390/ma16031047), 2023-01-24
Supplement: s1 [file s1]

**Summary of content:**

Table S1. Mix composition of the hot asphalt mixtures for the binder layer.

Table S2. Mix composition of the asphalt mixtures for the base layer.

Table S3. Indirect tensile stiffness modulus results at 5, 10, 20, and 30 °C for the asphalt mixtures under analysis.

Table S4. Traffic and load data for asphalt pavement design.

Table S5. Overview of the maintenance alternatives considered for the application of the methodology

Table S6. Overview of the data sources for Life Cycle Assessment

Table S7. Results of LCCA as obtained from the IBIM analysis tool

Table S8. Decision matrix of the case study as obtained from the IBIM tool

**Table S1.** Mix composition of the hot asphalt mixtures for the binder layer.

| Mixture ID            | Properties                           | HMA   | HMAC  | HMMA  | PMA   |
|-----------------------|--------------------------------------|-------|-------|-------|-------|
| Mix composition       | Limestone 12/18 mm                   | 25%   | 23%   | 25%   | 25%   |
|                       | Limestone 6/12 mm                    | 33%   | 29%   | 33%   | 33%   |
|                       | Limestone 3/6 mm                     | –     | 13%   |       |       |
|                       | Limestone sand                       | 38%   | 31%   | 38%   | 38%   |
|                       | Limestone filler                     | 4%    | –     | 4%    | 4%    |
|                       | CDW                                  | –     | 4%    | –     | –     |
|                       | Bitumen wa.% *                       | 5.00% | 5.75% | 5.00% | 5.00% |
|                       | Polymer pellets wb.% **              | –     | –     | –     | 5.00% |
| Volumetric properties | % air voids                          | 4.00% | 4.20% | 4.00% | 4.20% |
|                       | Specific gravity, g·cm <sup>-3</sup> | 2.52  | 2.48  | 2.50  | 2.50  |

**Table S2.** Mix composition of the asphalt mixtures for the base layer.

| Mixture ID            | Properties                           | HMA   | HMAJ  | CMRA  |
|-----------------------|--------------------------------------|-------|-------|-------|
| Mix composition       | Limestone 18/31.5 mm                 | 9%    | 9%    | 16%   |
|                       | Limestone 12/18 mm                   | 32%   | 32%   | 7%    |
|                       | Limestone 6/12 mm                    | 31%   | 31%   | –     |
|                       | Limestone sand                       | 21%   | 21%   | –     |
|                       | Limestone filler                     | 7%    | –     | 7%    |
|                       | JGW                                  | –     | 7%    | –     |
|                       | RAP                                  | –     | –     | 70%   |
|                       | Bitumen wa.%                         | 4.50% | 4.85% | –     |
|                       | Bituminous emulsion wa.%             | –     | –     | 3.75% |
|                       | Cement wa.%                          | –     | –     | 1.50% |
| Volumetric properties | Air voids                            | 4.00% | 3.90% | 9.00% |
|                       | Specific gravity, g·cm <sup>-3</sup> | 2.35  | 2.37  | 2.49  |

**Table S3.** Indirect tensile stiffness modulus results at 5, 10, 20, and 30 °C for the asphalt mixtures under analysis.

| Asphalt Layer  | Mixture        | ITSM (MPa) – EN 12697-26 Annex C |       |       |       |       |
|----------------|----------------|----------------------------------|-------|-------|-------|-------|
|                | Identification | 5 °C                             | 10 °C | 20 °C | 30 °C | $\nu$ |
| Wearing course | HMA            | 10013                            | 6931  | 3077  | 1355  | 0.35  |
|                | HMA            | 12780                            | 8279  | 5299  | 1818  | 0.35  |
| Binder layer   | HMAC           | 11921                            | 8120  | 5301  | 1977  | 0.35  |
|                | HMMA           | 25136                            | 15391 | 8613  | 3402  | 0.35  |
|                | PMA            | 31143                            | 16498 | 9582  | 2897  | 0.35  |
|                | HMA            | 15500                            | 10220 | 5952  | 2960  | 0.35  |
| Base layer     | HMAJ           | 17649                            | 11725 | 6826  | 3204  | 0.35  |
|                | CMRA           | 9101                             | 6380  | 3267  | 2203  | 0.35  |

**Table S4.** Traffic and load data for asphalt pavement design.

| Parameter                           | Units | Value                            |
|-------------------------------------|-------|----------------------------------|
| Road category                       | -     | C                                |
| AADT - Annual Average Daily Traffic | 1/d   | 5000                             |
| Rate of heavy vehicles              | %     | 5                                |
| R – Traffic growth rate             | %     | 3                                |
| Traffic spectrum                    | -     | Road category C traffic spectrum |
| ESALS in 20 years                   | -     | 1'633'384                        |

**Table S5.** Overview of the maintenance alternatives considered for the application of the methodology.

| Type of maintenance intervention | Description                                                                        | Expected frequency of maintenance interventions | Materials' alternatives in the case study      |
|----------------------------------|------------------------------------------------------------------------------------|-------------------------------------------------|------------------------------------------------|
| Local repairs                    | Potholes repair (patching)                                                         | 1-2 years                                       | Asphalt mixture depending on the pothole depth |
|                                  | Crack sealing                                                                      | 1-2 years                                       | Asphalt sealants                               |
| Surface rehabilitation           | Milling and reconstruction of the wearing course                                   | 3-5 years                                       | HMA – wearing course                           |
| Deep rehabilitation              | Milling and reconstruction of the wearing course and binder layer                  | 5-15 years                                      | HMA – wearing course                           |
|                                  |                                                                                    |                                                 | HMA – binder layer                             |
|                                  |                                                                                    |                                                 | HMAC – binder layer                            |
|                                  |                                                                                    |                                                 | PMA – binder layer                             |
|                                  |                                                                                    |                                                 | HMMA – binder layer                            |
|                                  |                                                                                    |                                                 | HMA – wearing course                           |
| Reconstruction                   | Milling and reconstruction of the asphalt layers (base, binder and wearing course) | 10-30 years                                     | HMA – binder layer                             |
|                                  |                                                                                    |                                                 | HMAC – binder layer                            |
|                                  |                                                                                    |                                                 | PMA – binder layer                             |
|                                  |                                                                                    |                                                 | HMMA – binder layer                            |
|                                  |                                                                                    |                                                 | HMA – base layer                               |
|                                  |                                                                                    |                                                 | CMRA – base layer                              |
|                                  |                                                                                    |                                                 | HMAJ – base layer                              |

**Table S6.** Overview of the data sources for Life Cycle Assessment.

| Phase of the life cycle                                        | Unit process                                                | Primary data                                                                                                                 | Year of survey | Secondary data                                                                                                                                                                                                                                                   |
|----------------------------------------------------------------|-------------------------------------------------------------|------------------------------------------------------------------------------------------------------------------------------|----------------|------------------------------------------------------------------------------------------------------------------------------------------------------------------------------------------------------------------------------------------------------------------|
| Aggregates production                                          | coarse limestone aggregates                                 | Amount in the asphalt mixtures                                                                                               | 2019/2020      | Ecoinvent 3 database: Gravel, crushed {RoW}  production   Cut-off, U                                                                                                                                                                                             |
|                                                                | coarse basalt aggregates                                    |                                                                                                                              |                | Ecoinvent 3 database: Basalt {RER}  quarry operation   Cut-off, U                                                                                                                                                                                                |
|                                                                | limestone sand                                              |                                                                                                                              |                | Ecoinvent 3 database: Sand {RoW}  gravel and quarry operation   Cut-off, U                                                                                                                                                                                       |
|                                                                | limestone filler                                            |                                                                                                                              |                | Ecoinvent 3 database: Lime, packed {Europe without Switzerland}  lime production, milled, packed   Cut-off, U                                                                                                                                                    |
| Bituminous binders production                                  | neat bitumen                                                | Amount in the asphalt mixtures                                                                                               | 2019/2020      | The Eurobitume Life-Cycle Inventory for Bitumen, Version 3.1, European Bitumen Association, Brussels, Belgium (2020)                                                                                                                                             |
|                                                                | SBS-modified bitumen                                        |                                                                                                                              |                |                                                                                                                                                                                                                                                                  |
| Cement production                                              | bitumen emulsion                                            | Amount in the cold asphalt mixtures                                                                                          | 2019/2020      | Ecoinvent 3 database: Cement, Portland {Europe without Switzerland}  market for   Cut-off, U                                                                                                                                                                     |
| Recycled polymer pellets production                            | cement production                                           |                                                                                                                              |                |                                                                                                                                                                                                                                                                  |
| CDW management                                                 | Plastic waste recycling and shredding                       | Amount in the asphalt mixture                                                                                                | 2019/2020      | Ecoinvent 3 database: Polyethylene terephthalate, granulate, bottle grade, recycled {RoW}  polyethylene terephthalate production, granulate, bottle grade, recycled   Cut-off, U                                                                                 |
|                                                                | Pelletisation                                               |                                                                                                                              |                | Santos et al. (2021)                                                                                                                                                                                                                                             |
| JGW management                                                 | Waste concrete treatment facility                           | Amount in the asphalt mixture                                                                                                | 2019/2020      | Ecoinvent 3: Waste concrete gravel {RoW}  treatment of waste concrete gravel, recycling   Cut-off, U                                                                                                                                                             |
|                                                                | JGW collection                                              | Amount of JGW produced in the construction site (210 t) Productivity of the shovel (24.8 m³/h)                               | 2019           | Ecoinvent 3 database: Machine operation, diesel, >= 74.57 kW, steady-state {GLO}  market for   Cut-off, U (Crushing of JGW)                                                                                                                                      |
|                                                                | JGW crushing                                                | Amount in the asphalt mixtures Productivity of the jaw mill (150 t/h)                                                        | 2019/2020      | Ecoinvent 3 database: Machine operation, diesel, >= 74.57 kW, steady-state {GLO}  market for   Cut-off, U (Crushing of JGW)                                                                                                                                      |
|                                                                | RAP collection                                              | Amount of RAP produced in the construction site (210 t)                                                                      | 2019           | Ecoinvent 3: Waste asphalt {RoW}  treatment of, sanitary landfill   Cut-off, U                                                                                                                                                                                   |
| RAP management                                                 | Asphalt plant infrastructure                                | Amount of aggregates in the hot mix asphalt                                                                                  | 2019/2020      | Ecoinvent 3 database: Industrial machine, heavy, unspecified {GLO}  market for   Cut-off, U                                                                                                                                                                      |
|                                                                | Wheel loader for aggregates moving                          |                                                                                                                              |                | Ecoinvent 3 database: Machine operation, diesel, >= 74.57 kW, steady-state {GLO}  market for   Cut-off, U                                                                                                                                                        |
|                                                                | Conveyor belt                                               |                                                                                                                              |                | Ecoinvent 3 database: Machine operation, diesel, >= 74.57 kW, steady-state {GLO}  market for   Cut-off, U                                                                                                                                                        |
|                                                                | Aggregates drying                                           |                                                                                                                              |                | Ecoinvent 3 database: Conveyor belt {GLO}  market for   Cut-off, U                                                                                                                                                                                               |
| Hot mix asphalt production                                     | Aggregates drying                                           | Unit natural gas consumption (8.79 m3/t of asphalt mix)                                                                      | 2019/2020      | Ecoinvent 3 database: Drying, natural gas {GLO}  market for   Cut-off, U                                                                                                                                                                                         |
|                                                                |                                                             | Amount of asphalt mixture                                                                                                    | 2019/2020      | Ecoinvent 3 database: Electricity, medium voltage {IT}  market for   Cut-off, U<br>United States Environmental Protection Agency: emissions of Benzo(a)pyrene = 4.66E-10 kg/t<br>United States Environmental Protection Agency: emissions of NMVOC = 0.00019 kg/ |
|                                                                | Asphalt mixing                                              | Unit electricity consumption = 4.37 kWh/t of asphalt mix                                                                     |                |                                                                                                                                                                                                                                                                  |
|                                                                | Asphalt mixing                                              | Amount of asphalt mixture.                                                                                                   | 2019/2020      | Ecoinvent 3 database: Machine operation, diesel, >= 74.57 kW, steady-state {GLO}  market for   Cut-off, U                                                                                                                                                        |
| Pavement construction with hot mix asphalt                     | Laying of hot mix asphalt                                   | Amount of asphalt mixture productivity of machinery = 351 t/h (wearing course), 205 t/h (binder layer), 117 t/h (base layer) | 2021           | Ecoinvent 3 database: Machine operation, diesel, >= 74.57 kW, steady-state {GLO}  market for   Cut-off, U (Paver)                                                                                                                                                |
|                                                                | Compaction of hot mix asphalt                               | Amount of cold asphalt mixture Grader productivity = 545 m2/h                                                                | 2019/2020      | Ecoinvent 3 database: Machine operation, diesel, >= 18.64 kW and < 74.57 kW, steady-state {GLO}  market for   Cut-off, U (Roller)                                                                                                                                |
|                                                                | Surface levelling and RAP placing over the pavement surface |                                                                                                                              |                | Ecoinvent 3 database: Machine operation, diesel, >= 74.57 kW, steady-state {GLO}  market for   Cut-off, U (Grader)                                                                                                                                               |
|                                                                | Mixing of components and laying of cold mix asphalt         | Pulvimixer productivity = 750m2/h                                                                                            | 2021           | Ecoinvent 3 database: Machine operation, diesel, >= 74.57 kW, steady-state {GLO}  market for   Cut-off, U (Pulvimixer)                                                                                                                                           |
| Base layer construction with cold in-place recycling technique | Compaction of cold mix asphalt                              | 3 rollers, productivity = 141 t/h                                                                                            | 2021           | Ecoinvent 3 database: Machine operation, diesel, >= 74.57 kW, steady-state {GLO}  market for   Cut-off, U (Roller 1)                                                                                                                                             |
|                                                                |                                                             |                                                                                                                              |                | Ecoinvent 3 database: Machine operation, diesel, >= 18.64 kW and < 74.57 kW, steady-state {GLO}  market for   Cut-off, U (Roller 2)                                                                                                                              |
|                                                                |                                                             |                                                                                                                              |                | Ecoinvent 3 database: Machine operation, diesel, >= 18.64 kW and < 74.57 kW, steady-state {GLO}  market for   Cut-off, U (Roller 3)                                                                                                                              |
|                                                                | Compaction of cold mix asphalt                              | Productivity of the milling machine = 150 t/h                                                                                | 2020           | Ecoinvent 3 database: Machine operation, diesel, >= 74.57 kW, steady-state {GLO}  market for   Cut-off, U (Milling machine)                                                                                                                                      |
| End of life                                                    | Demolition of the pavement                                  | Productivity of the milling machine = 150 t/h                                                                                | 2020           | Ecoinvent 3 database: Machine operation, diesel, >= 74.57 kW, steady-state {GLO}  market for   Cut-off, U (Milling machine)                                                                                                                                      |
|                                                                | Disposal in landfill                                        | Amount of landfilled asphalt waste                                                                                           | 2019           | Ecoinvent 3 database: Waste asphalt {RoW}  treatment of, sanitary landfill   Cut-off, U                                                                                                                                                                          |
|                                                                | Transport by ship                                           | Covered distance. Amount of materials (raw materials, asphalt mixtures, asphalt waste) to be supplied                        | 2019/2020      | Ecoinvent 3 database: Transport, freight, sea, tanker for liquid goods other than petroleum and liquefied natural gas {GLO}  market for transport, freight, sea, tanker for liquid goods other than petroleum and liquefied natural gas   Cut-off, U             |
|                                                                | Transport by road                                           | Covered distance. Amount of materials (raw materials, asphalt mixtures, asphalt waste) to be supplied                        | 2019/2020      | Ecoinvent 3 database: Transport, freight, lorry 16-32 metric ton, euro4 {RER}  market for transport, freight, lorry 16-32 metric ton, EURO4   Cut-off, U                                                                                                         |

**Table S7.** Results of LCCA as obtained from the IBIM analysis tool.

| n° | Type of approach | Pavement solution | LCC without considering the salvage value | Salvage value | LCC indicator |
|----|------------------|-------------------|-------------------------------------------|---------------|---------------|
| 1  | Reconstruction   | HMA-HMA-HMA       | 1,394,143.7 €                             | 36,570.5 €    | 1,357,573.2 € |
| 2  | Reconstruction   | HMA-PMA-HMA       | 1,279,211.7 €                             | 98,897.1 €    | 1,180,314.6 € |
| 3  | Reconstruction   | HMA-HMMA-HMA      | 1,300,240.7 €                             | 79,719.6 €    | 1,220,521.1 € |
| 4  | Reconstruction   | HMA-HMAC-HMA      | 1,307,867.5 €                             | 57,985.6 €    | 1,249,881.8 € |
| 5  | Reconstruction   | HMA-HMA-CMRA      | 1,025,674.8 €                             | 6,982.3 €     | 1,018,692.5 € |
| 6  | Reconstruction   | HMA-PMA-CMRA      | 946,954.2 €                               | 87,554.5 €    | 859,399.6 €   |
| 7  | Reconstruction   | HMA-HMMA-CMRA     | 979,180.1 €                               | 60,034.9 €    | 919,145.1 €   |
| 8  | Reconstruction   | HMA-HMAC-CMRA     | 962,464.6 €                               | 59,010.1 €    | 903,454.5 €   |
| 9  | Reconstruction   | HMA-HMA-HMAJ      | 902,280.9 €                               | 108,807.7 €   | 793,473.1 €   |
| 10 | Reconstruction   | HMA-PMA-HMAJ      | 751,723.5 €                               | 33,210.3 €    | 718,513.2 €   |
| 11 | Reconstruction   | HMA-HMMA-HMAJ     | 770,452.4 €                               | 9,236.1 €     | 761,216.3 €   |
| 12 | Reconstruction   | HMA-HMAC-HMAJ     | 882,517.6 €                               | 118,020.2 €   | 764,497.4 €   |
| 13 | Rehabilitation   | HMA-HMA           | 1,357,055.4 €                             | 36,758.5 €    | 1,320,296.9 € |
| 14 | Rehabilitation   | HMA-PMA           | 1,011,163.0 €                             | 6,597.7 €     | 1,004,565.4 € |
| 15 | Rehabilitation   | HMA-HMMA          | 981,135.2 €                               | 28,589.9 €    | 952,545.2 €   |
| 16 | Rehabilitation   | HMA-HMAC          | 1,175,187.7 €                             | 19,060.0 €    | 1,156,127.8 € |

**Table S8.** Decision matrix of the case study as obtained from the IBIM tool.

| Pavement solution | Units        | HMA-HMA-HMA | HMA-PMA-HMA | HMA-HMMA-HMA | HMA-HMAC-HMA | HMA-HMA-CMRA | HMA-PMA-CMRA | HMA-HMMA-CMRA | HMA-HMAC-CMRA | HMA-HMA-HMAJ | HMA-PMA-HMAJ | HMA-HMMA-HMAJ | HMA-HMAC-HMAJ | HMA-HMA   | HMA-PMA   | HMA-HMMA  | HMA-HMAC    |
|-------------------|--------------|-------------|-------------|--------------|--------------|--------------|--------------|---------------|---------------|--------------|--------------|---------------|---------------|-----------|-----------|-----------|-------------|
| R                 | mm           | 21.1966     | 1.3608      | 1.9282       | 16.1826      | 12.305       | 0.6884       | 0.5841        | 0.1748        | 1.521        | 0.7635       | 18.12         | 22            | 15.645    | 16.12     | 5.01      | 13.01       |
| FD                | -            | 0.81        | 0.56        | 0.51         | 0.46         | 0.82         | 0.1495       | 0.2916        | 0.27          | 0.4496       | 0.1634       | 0.8301        | 1             | 0.7288    | 0.11      | 0.07      | 0.16        |
| PCI               | -            | 60          | -           | -            | -            | -            | -            | -             | -             | -            | -            | -             | -             | 59        | -         | -         | -           |
| GWP               | kg CO2 eq    | 1.29E+06    | 1.08E+06    | 1.14E+06     | 1.20E+06     | 1.04E+06     | 8.36E+05     | 9.25E+05      | 8.96E+05      | 9.44E+05     | 7.87E+05     | 8.81E+05      | 8.99E+05      | 1720274.6 | 997273.89 | 946543.18 | 1429456.904 |
| ODP               | kg CFC11 eq  | 5.33E-01    | 6.28E-01    | 6.44E-01     | 5.70E-01     | 5.87E-01     | 5.12E-01     | 5.46E-01      | 5.97E-01      | 5.60E-01     | 6.77E-01     | 7.10E-01      | 5.39E-01      | 0.7101022 | 0.4105362 | 0.3857556 | 0.590057207 |
| IR                | kBq Co-60 eq | 5.68E+04    | 6.87E+04    | 7.01E+04     | 6.07E+04     | 6.57E+04     | 5.39E+04     | 6.01E+04      | 6.21E+04      | 6.00E+04     | 7.25E+04     | 7.60E+04      | 5.76E+04      | 75675.815 | 44665.822 | 41776.632 | 62882.58657 |
| OFH               | kg NOx eq    | 6.78E+03    | 8.03E+03    | 8.33E+03     | 7.26E+03     | 7.63E+03     | 6.74E+03     | 7.16E+03      | 8.01E+03      | 7.37E+03     | 8.90E+03     | 9.43E+03      | 7.08E+03      | 9040.5165 | 5246.2448 | 4969.3242 | 7512.189479 |
| PM                | kg PM2.5 eq  | 1.00E+04    | 1.21E+04    | 1.26E+04     | 1.07E+04     | 8.18E+03     | 7.37E+03     | 7.73E+03      | 8.59E+03      | 1.11E+04     | 1.34E+04     | 1.41E+04      | 1.06E+04      | 13353.14  | 7891.0948 | 7459.1971 | 11095.7511  |
| OFT               | kg NOx eq    | 7.38E+03    | 8.75E+03    | 9.07E+03     | 7.89E+03     | 8.13E+03     | 7.18E+03     | 7.62E+03      | 8.53E+03      | 8.03E+03     | 9.70E+03     | 1.03E+04      | 7.71E+03      | 9831.1039 | 5712.7273 | 5409.4291 | 8169.125589 |
| A                 | kg SO2 eq    | 4.79E+03    | 5.70E+03    | 5.97E+03     | 5.12E+03     | 5.77E+03     | 5.03E+03     | 5.51E+03      | 6.06E+03      | 5.25E+03     | 6.35E+03     | 6.81E+03      | 5.04E+03      | 6384.6896 | 3718.5306 | 3547.6046 | 5305.338253 |
| FE                | kg P eq      | 1.76E+02    | 2.14E+02    | 2.18E+02     | 1.89E+02     | 2.04E+02     | 1.62E+02     | 1.91E+02      | 2.14E+02      | 1.87E+02     | 2.28E+02     | 2.37E+02      | 1.80E+02      | 235.26383 | 139.32198 | 129.83593 | 195.4917581 |
| ME                | kg N eq      | 1.59E+03    | 1.94E+03    | 2.00E+03     | 1.70E+03     | 1.76E+03     | 1.56E+03     | 1.63E+03      | 1.85E+03      | 1.76E+03     | 2.13E+03     | 2.24E+03      | 1.69E+03      | 2119.8758 | 1257.2609 | 1186.8151 | 1761.50429  |
| TECO              | kg 1,4-DCB   | 1.02E+07    | 1.15E+07    | 1.18E+07     | 1.09E+07     | 1.02E+07     | 9.17E+06     | 9.53E+06      | 1.07E+07      | 1.04E+07     | 1.25E+07     | 1.31E+07      | 9.96E+06      | 13639255  | 7629157.9 | 7176554.7 | 11333497.43 |
| FECO              | kg 1,4-DCB   | 4.78E+04    | 5.78E+04    | 5.88E+04     | 5.11E+04     | 5.23E+04     | 4.65E+04     | 4.86E+04      | 5.49E+04      | 5.14E+04     | 6.27E+04     | 6.52E+04      | 4.94E+04      | 63718.874 | 37597.928 | 35074.833 | 52947.00289 |
| MECO              | kg 1,4-DCB   | 6.87E+04    | 8.27E+04    | 8.42E+04     | 7.35E+04     | 7.47E+04     | 6.65E+04     | 6.94E+04      | 7.84E+04      | 7.36E+04     | 8.97E+04     | 9.33E+04      | 7.07E+04      | 91619.692 | 53834.425 | 50264.811 | 76131.10186 |
| CT                | kg 1,4-DCB   | 3.57E+04    | 4.29E+04    | 4.37E+04     | 3.82E+04     | 3.87E+04     | 3.36E+04     | 3.61E+04      | 4.06E+04      | 3.80E+04     | 4.61E+04     | 4.82E+04      | 3.65E+04      | 47597.65  | 27949.231 | 26110.942 | 39551.12114 |
| NCT               | kg 1,4-DCB   | 8.34E+05    | 9.95E+05    | 1.01E+06     | 8.92E+05     | 9.02E+05     | 7.96E+05     | 8.41E+05      | 9.48E+05      | 8.75E+05     | 1.07E+06     | 1.11E+06      | 8.41E+05      | 1111894.5 | 649004.63 | 603694.77 | 923925.3599 |
| LU                | m2a crop eq  | 1.15E+05    | 1.38E+05    | 1.42E+05     | 1.23E+05     | 1.34E+05     | 1.19E+05     | 1.24E+05      | 1.41E+05      | 1.22E+05     | 1.47E+05     | 1.55E+05      | 1.17E+05      | 153100.19 | 89815.339 | 84626.625 | 127218.1357 |
| MR                | kg Cu eq     | 4.50E+03    | 5.33E+03    | 5.44E+03     | 4.81E+03     | 5.50E+03     | 4.86E+03     | 5.08E+03      | 5.77E+03      | 4.75E+03     | 5.75E+03     | 6.02E+03      | 4.56E+03      | 5994.1223 | 3482.6536 | 3257.7976 | 4980.79752  |
| FR                | kg oil eq    | 1.19E+06    | 1.42E+06    | 1.48E+06     | 1.27E+06     | 1.56E+06     | 1.36E+06     | 1.45E+06      | 1.64E+06      | 1.39E+06     | 1.68E+06     | 1.78E+06      | 1.33E+06      | 1580071   | 925835.96 | 877974.78 | 1312955.113 |
| W                 | m3           | 2.06E+04    | 2.52E+04    | 2.67E+04     | 2.20E+04     | 2.31E+04     | 2.04E+04     | 2.25E+04      | 2.43E+04      | 2.22E+04     | 2.68E+04     | 2.91E+04      | 2.13E+04      | 27468.742 | 16324.641 | 15686.942 | 22825.06678 |
| LCC indicator     | €            | 1.36E+06    | 1.18E+06    | 1.22E+06     | 1.25E+06     | 1.02E+06     | 8.59E+05     | 9.19E+05      | 9.03E+05      | 7.93E+05     | 7.19E+05     | 7.61E+05      | 7.64E+05      | 1320296.9 | 1004565.4 | 952545.23 | 1156127.76  |
